# Supplementary material
Source: PubMed Central journal article supplement (PMC3365984)

**A**

*Membrane*

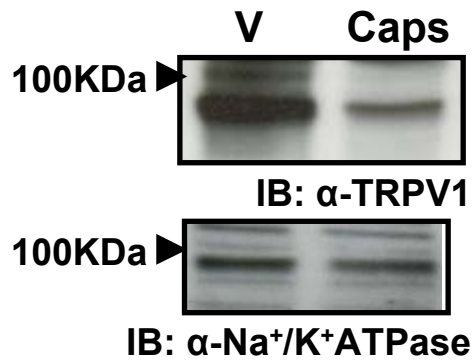

**B**

*Membrane*

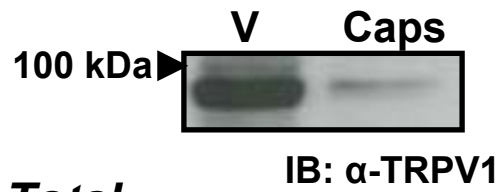

*Total*

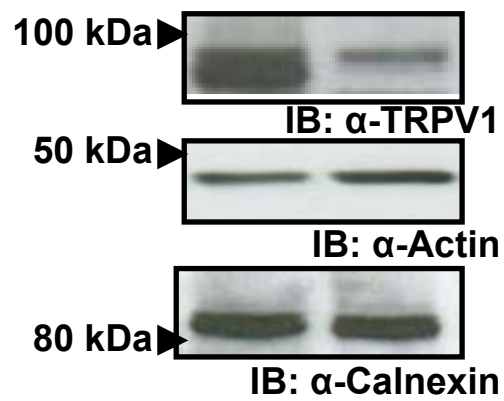

Supplement: supp_M111.289751_jbc.M111.289751-1.pdf [file supp_M111.289751_jbc.M111.289751-1.pdf]
